# Supplementary material for: Diagnostic accuracy of the Depression subscale of the Hospital Anxiety and Depression Scale (HADS-D) for detecting major depression: protocol for a systematic review and individual patient data meta-analyses
Source: PubMed Central journal article supplement — BMJ Open. 2016 Apr 13;6(4):e011913. doi: 10.1136/bmjopen-2016-011913 (PMC4838677; doi:10.1136/bmjopen-2016-011913), 2016-04-13
Supplement: bmjopen-2016-011913supp1.pdf [file bmjopen-2016-011913supp1.pdf]

## SUPPLEMENTARY FILE 1: SEARCH STRATEGIES

### Ovid MEDLINE: Ovid MEDLINE(R) In-Process & Other Non-Indexed Citations and Ovid MEDLINE (R)

|                                                                                                                                                                                                                                                                                                                                                                                                                                                                                                                                                                                                                                                                                                                                                                                                                                                                                                                                                                                                                                                                                                                                                                                                                                                                                                                                |                                           |
|--------------------------------------------------------------------------------------------------------------------------------------------------------------------------------------------------------------------------------------------------------------------------------------------------------------------------------------------------------------------------------------------------------------------------------------------------------------------------------------------------------------------------------------------------------------------------------------------------------------------------------------------------------------------------------------------------------------------------------------------------------------------------------------------------------------------------------------------------------------------------------------------------------------------------------------------------------------------------------------------------------------------------------------------------------------------------------------------------------------------------------------------------------------------------------------------------------------------------------------------------------------------------------------------------------------------------------|-------------------------------------------|
| <ol style="list-style-type: none"> <li>1. HADS*.af.</li> <li>2. "Hospital Anxiety and Depression".af.</li> <li>3. "Hospital Depression Scale".af.</li> <li>4. "Hospital Anxiety Scale".af.</li> <li>5. or/1-4</li> </ol>                                                                                                                                                                                                                                                                                                                                                                                                                                                                                                                                                                                                                                                                                                                                                                                                                                                                                                                                                                                                                                                                                                       | <p>Index Test<br/>Set</p>                 |
| <ol style="list-style-type: none"> <li>1. Mass Screening/</li> <li>2. Psychiatric Status Rating Scales/</li> <li>3. "Predictive Value of Tests"/</li> <li>4. "Reproducibility of Results"/</li> <li>5. exp "Sensitivity and Specificity"/</li> <li>6. Psychometrics/</li> <li>7. Prevalence/</li> <li>8. Reference Values/</li> <li>9. Reference Standards/</li> <li>10. exp Diagnostic Errors/</li> <li>11. Mental Disorders/di, pc [Diagnosis, Prevention &amp; Control]</li> <li>12. Mood Disorders/di, pc [Diagnosis, Prevention &amp; Control]</li> <li>13. Depressive Disorder/di, pc [Diagnosis, Prevention &amp; Control]</li> <li>14. Depressive Disorder, Major/di, pc [Diagnosis, Prevention &amp; Control]</li> <li>15. Depression, Postpartum/di, pc [Diagnosis, Prevention &amp; Control]</li> <li>16. Depression/di, pc [Diagnosis, Prevention &amp; Control]</li> <li>17. validation studies.pt.</li> <li>18. comparative study.pt.</li> <li>19. screen*.af.</li> <li>20. prevalence.af.</li> <li>21. predictive value*.af.</li> <li>22. detect*.ti.</li> <li>23. sensitiv*.ti.</li> <li>24. valid*.ti.</li> <li>25. revalid*.ti.</li> <li>26. predict*.ti.</li> <li>27. accur*.ti.</li> <li>28. psychometric*.ti.</li> <li>29. identif*.ti.</li> <li>30. specificit*.ab.</li> <li>31. cut?off*.ab.</li> </ol> | <p>Screening Accuracy Studies<br/>Set</p> |

|                                                                                                                                                                                                |               |
|------------------------------------------------------------------------------------------------------------------------------------------------------------------------------------------------|---------------|
| 32. cut* score*.ab.<br>33. cut?point*.ab.<br>34. threshold score*.ab.<br>35. reference standard*.ab.<br>36. reference test*.ab.<br>37. index test*.ab.<br>38. gold standard.ab.<br>39. or/1-38 |               |
| 46. 6 and 45                                                                                                                                                                                   | Combined Sets |

**PsycINFO**

|                                                                                                                                                                                                                                                                                                                                                                                                                                                                                                                                                                                                                                                                     |                                |
|---------------------------------------------------------------------------------------------------------------------------------------------------------------------------------------------------------------------------------------------------------------------------------------------------------------------------------------------------------------------------------------------------------------------------------------------------------------------------------------------------------------------------------------------------------------------------------------------------------------------------------------------------------------------|--------------------------------|
| 1. HADS*.af.<br>2. "Hospital Anxiety and Depression".af.<br>3. "Hospital Depression Scale".af.<br>4. "Hospital Anxiety Scale".af.<br>5. or/1-4                                                                                                                                                                                                                                                                                                                                                                                                                                                                                                                      | Index Test Set                 |
| 8. Diagnosis/<br>9. Medical Diagnosis/<br>10. Psychodiagnosis/<br>11. Misdiagnosis/<br>12. Screening/<br>13. Health Screening/<br>14. Screening Tests/<br>15. Prediction/<br>16. Cutting Scores/<br>17. Psychometrics/<br>18. Test Validity/<br>19. screen*.af.<br>20. predictive value*.af.<br>21. detect*.ti.<br>22. sensitiv*.ti.<br>23. valid*.ti.<br>24. revalid*.ti.<br>25. accura*.ti.<br>26. psychometric*.ti.<br>27. specificit*.ab.<br>28. cut?off*.ab.<br>29. cut* score*.ab.<br>30. cut?point*.ab.<br>31. threshold score*.ab.<br>32. reference standard*.ab.<br>33. reference test*.ab.<br>34. index test*.ab.<br>35. gold standard.ab.<br>36. or/8-35 | Screening Accuracy Studies Set |

|             |                  |
|-------------|------------------|
| 37.7 and 36 | Combined<br>Sets |
|-------------|------------------|

### **Web of Science**

#1. TS=(HADS\* OR "Hospital Anxiety and Depression" OR "Hospital anxiety scale"  
OR "Hospital depression scale")

#2. TS=(screen\* OR prevalence OR "predictive value\*" OR detect\* OR sensitiv\* OR  
valid\* OR revalid\* OR predict\* OR accura\* OR psychometric\* OR identif\* OR  
specificit\* OR cutoff\* OR "cut off\*" OR "cut\* score\*" OR cutpoint\* OR "cut point\*"  
OR "threshold score\*" OR "reference standard\*" OR "reference test\*" OR "index test\*"  
OR "gold standard" OR "reliab\*")

#2 AND #1

*Databases=SCI-EXPANDED, SSCI, A&HCI*
