# Supplementary figures and images for: Diagnostic accuracy of the Depression subscale of the Hospital Anxiety and Depression Scale (HADS-D) for detecting major depression: protocol for a systematic review and individual patient data meta-analyses
Source: PubMed Central journal article supplement — BMJ Open. 2016 Apr 13;6(4):e011913. doi: 10.1136/bmjopen-2016-011913 (PMC4838677; doi:10.1136/bmjopen-2016-011913), 2016-04-13

**SUPPLEMENTARY FILE 3: Draft Flow Diagram of Study Selection Process**

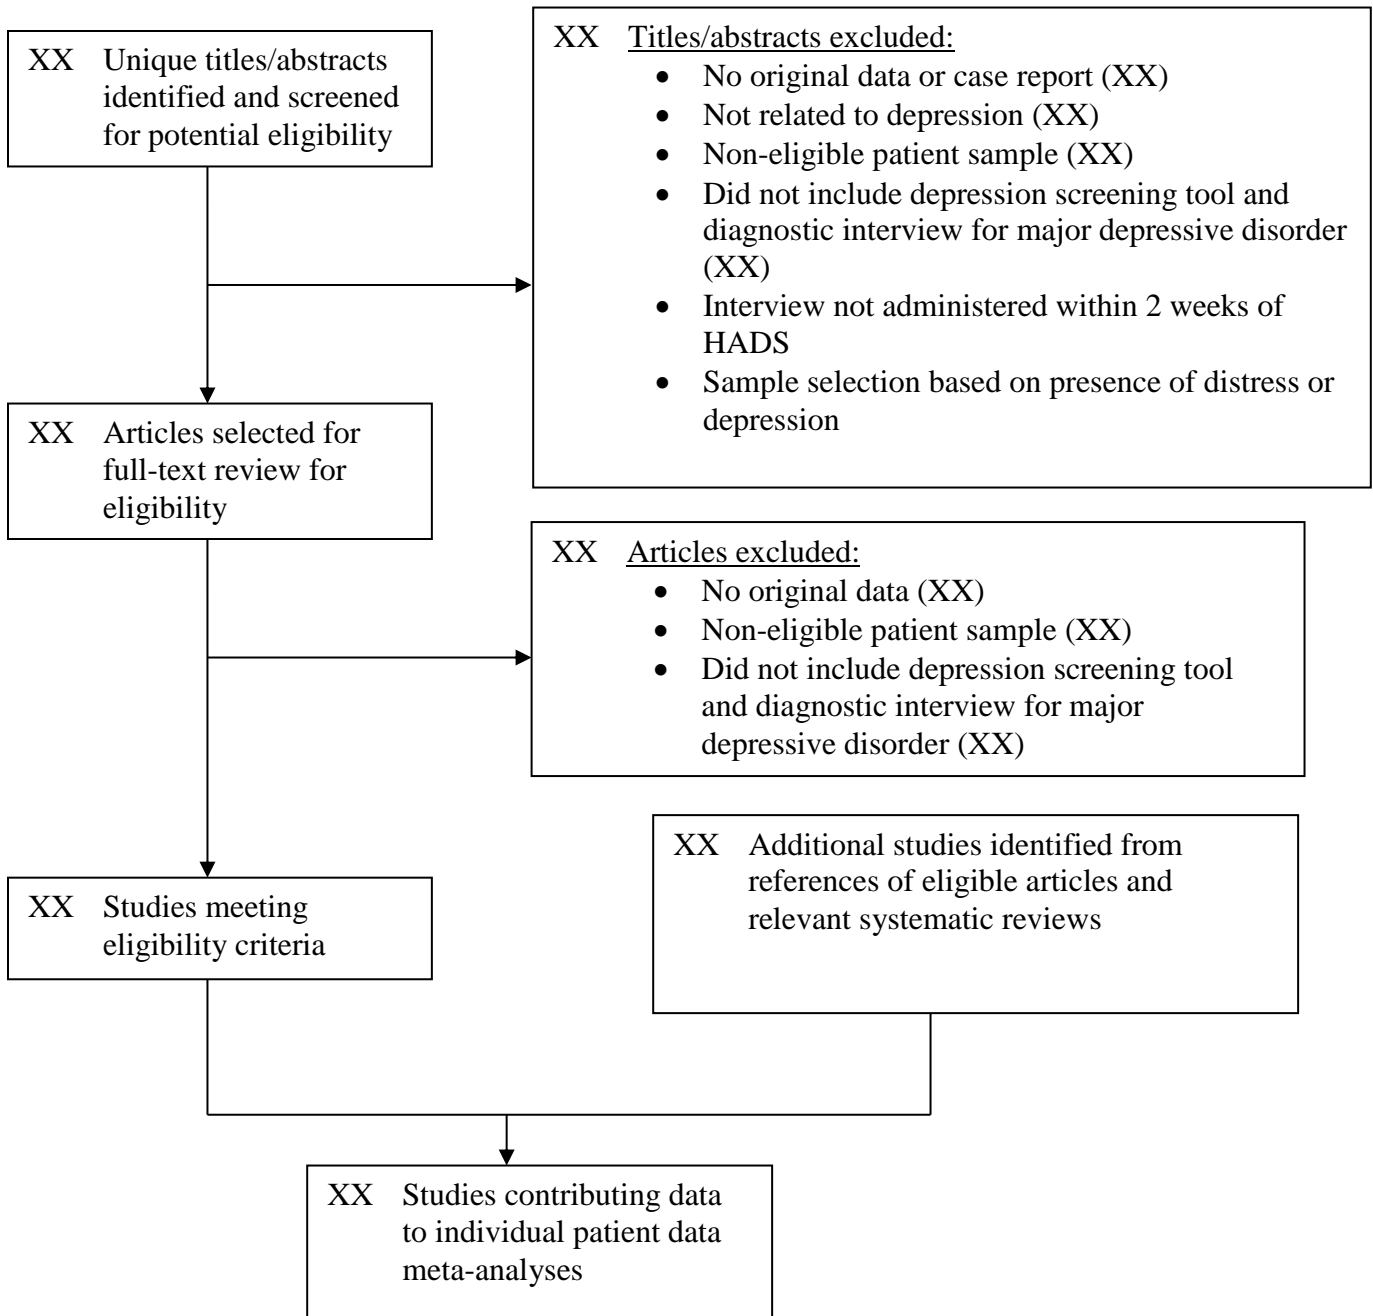

Supplement: bmjopen-2016-011913supp3.pdf [file bmjopen-2016-011913supp3.pdf]
